# Supplementary material
Source: MDPI journal article supplement (https://www.mdpi.com/2073-4344/5/4/1928)
Supplement: s1 [file s1]

## Supplementary Information

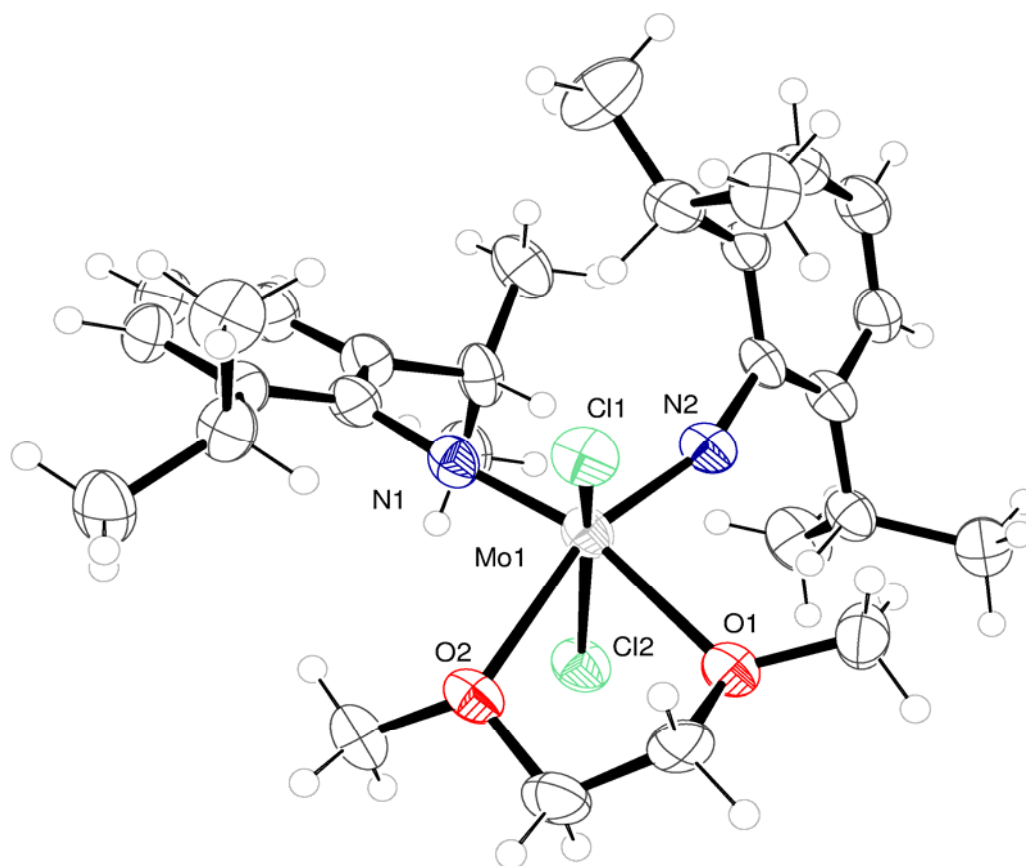

**Figure S1.** Molecular structure of **8**.

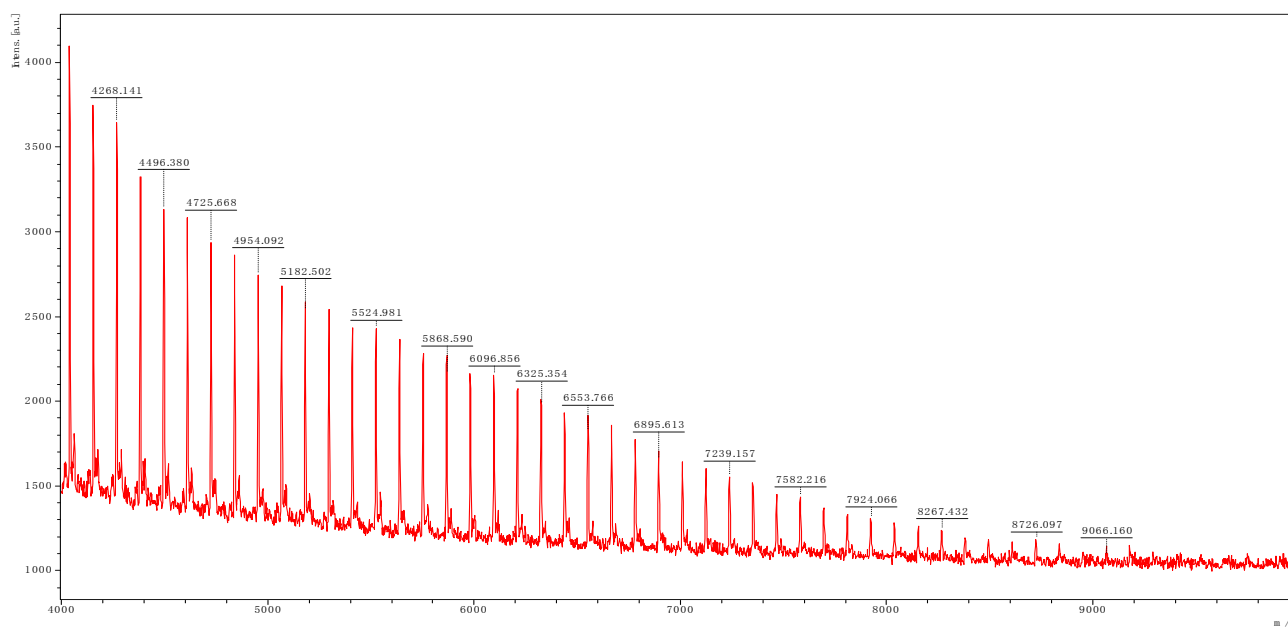

(a)

**Figure S2.** *Cont.*

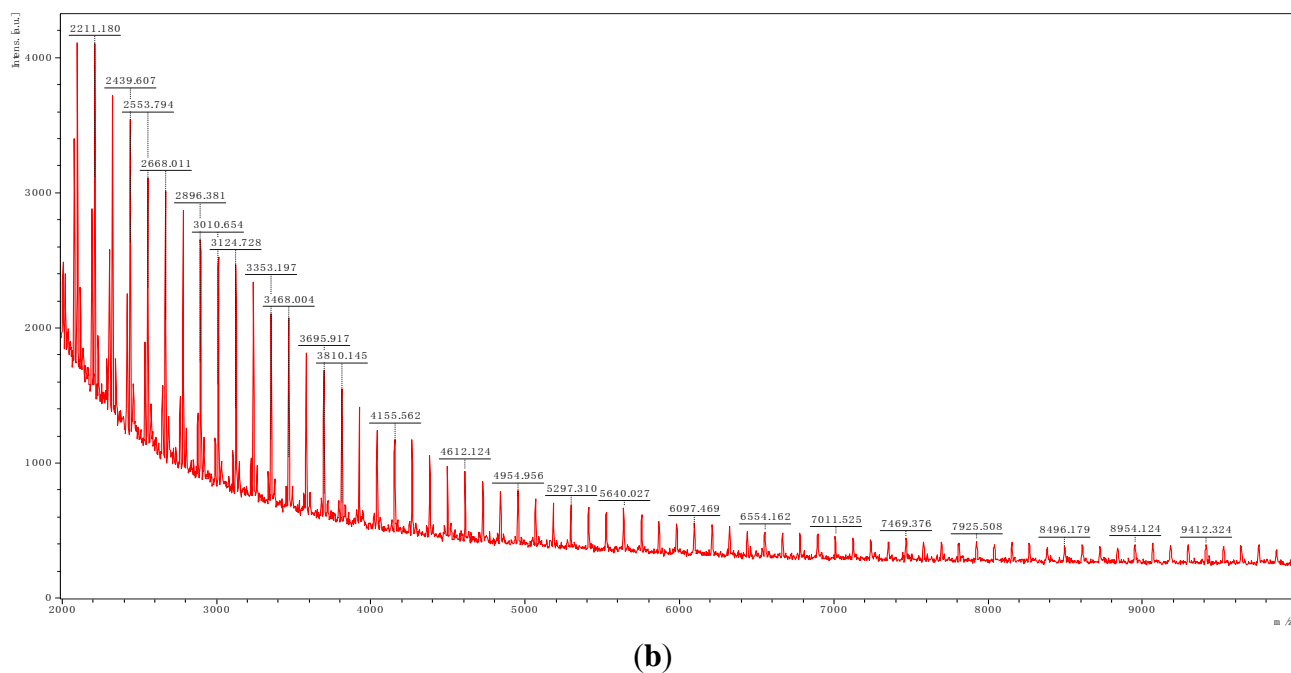

**Figure S2.** MALDI-ToF spectra for PCL from (a) **1** and (b) **5**.

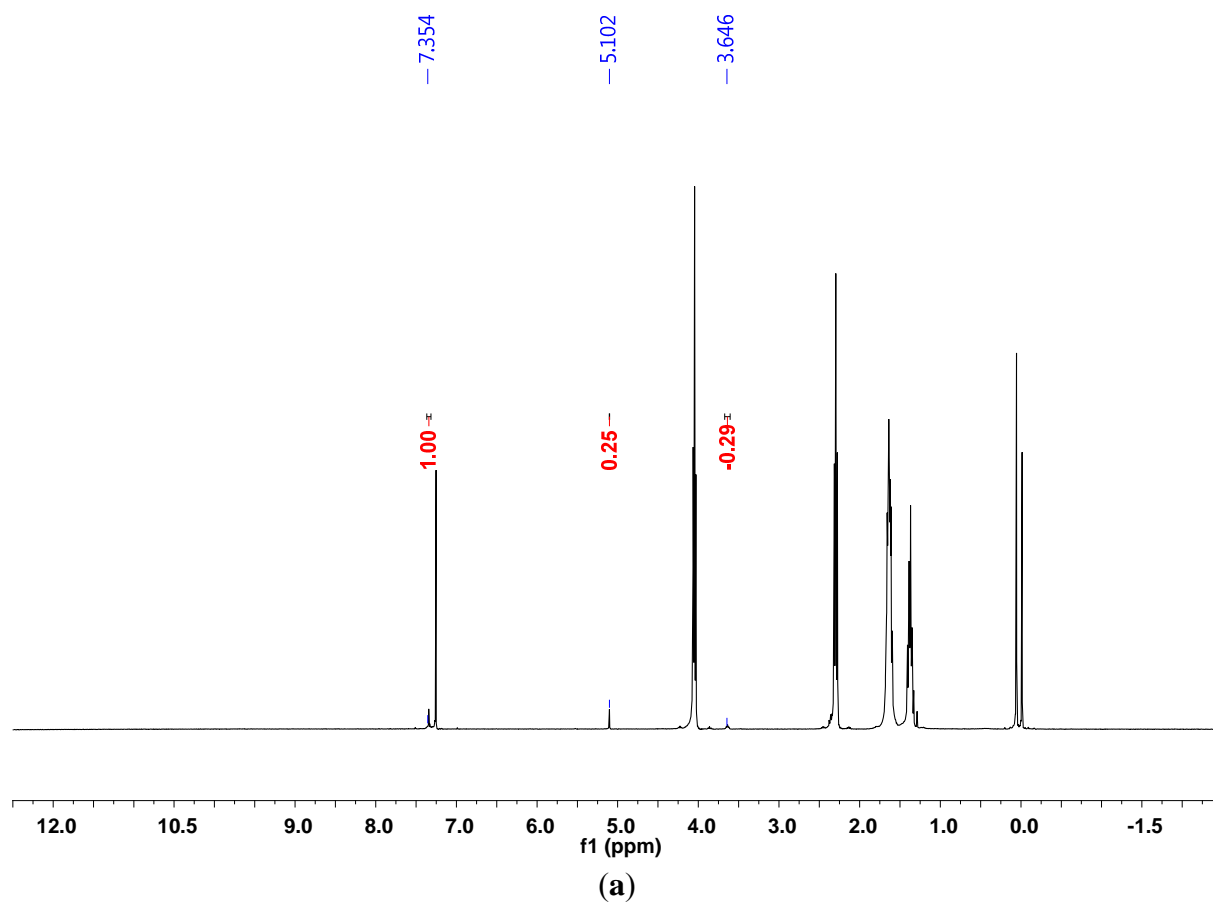

**Figure S3.** *Cont.*

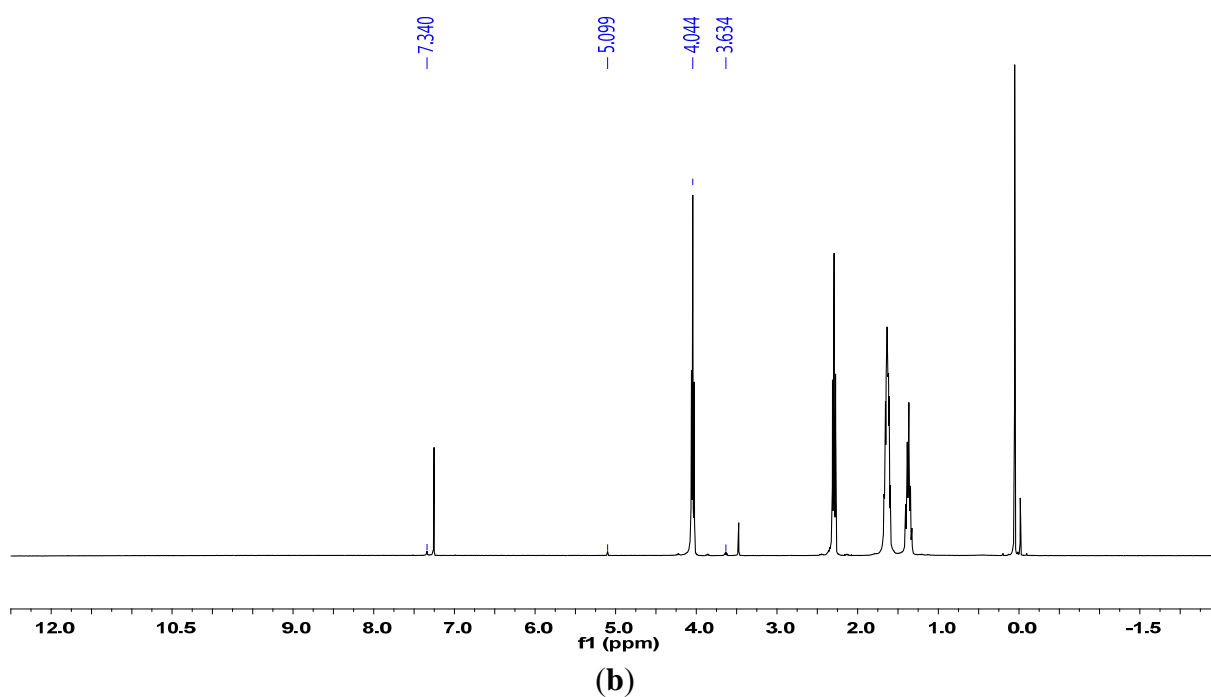

**Figure S3.**  $^1\text{H}$  NMR spectra for PCL from (a) 1 and (b) 5.

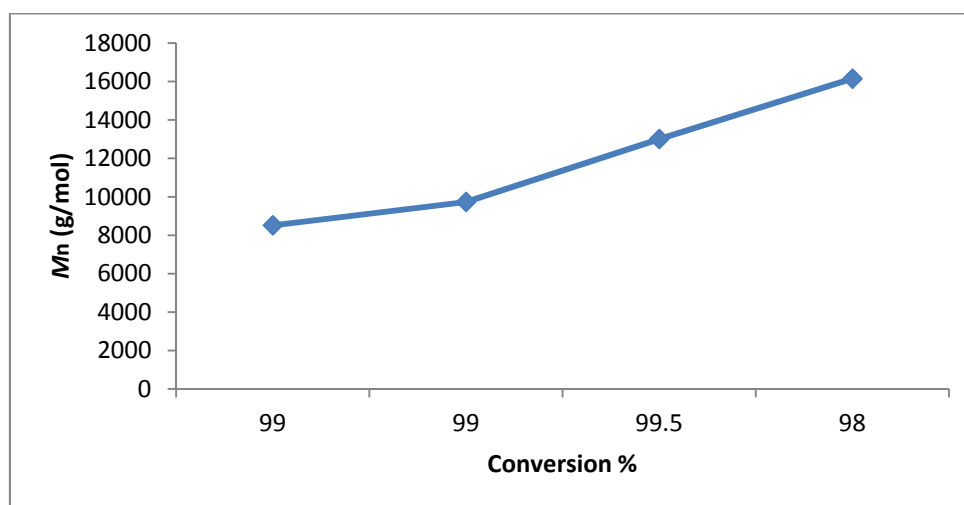

**Figure S4.** Plot of monomer conversion *versus* number average molecular weight for 3.

**Table S1.** Crystal data for **8**.

| Empirical formula                 | C <sub>28</sub> H <sub>44</sub> Cl <sub>2</sub> Mo N <sub>2</sub> O <sub>2</sub> |
|-----------------------------------|----------------------------------------------------------------------------------|
| Formula weight                    | 607.49                                                                           |
| Temperature                       | 150(2) K                                                                         |
| Wavelength                        | 0.71073 Å                                                                        |
| Crystal system                    | Triclinic                                                                        |
| Space group                       | <i>P</i> -1                                                                      |
| Unit cell dimensions              |                                                                                  |
| a = 10.0491(10) Å                 | $\alpha = 92.902(9)^\circ$                                                       |
| b = 10.6022(11) Å                 | $\beta = 90.577(9)^\circ$                                                        |
| c = 15.6133(19) Å                 | $\gamma = 112.932(8)^\circ$                                                      |
| Volume                            | 1529.2(3) Å <sup>3</sup>                                                         |
| Z                                 | 2                                                                                |
| Density (calculated)              | 1.319 Mg/m <sup>3</sup>                                                          |
| Absorption coefficient            | 0.629 mm <sup>-1</sup>                                                           |
| F(000)                            | 636                                                                              |
| Crystal size                      | 0.400 × 0.380 × 0.056 mm <sup>3</sup>                                            |
| Theta range for data collection   | 2.089 to 26.371°                                                                 |
| Index ranges                      | -12 ≤ <i>h</i> ≤ 12, -12 ≤ <i>k</i> ≤ 13, -19 ≤ <i>l</i> ≤ 19                    |
| Reflections collected             | 11706                                                                            |
| Independent reflections           | 6145 (R(int) = 0.0965)                                                           |
| Completeness to theta = 25.242°   | 98.2%                                                                            |
| Absorption correction             | Semi-empirical from equivalents                                                  |
| Max. and min. transmission        | 0.981 and 0.855                                                                  |
| Refinement method                 | Full-matrix least-squares on F <sup>2</sup>                                      |
| Data / restraints / parameters    | 6145/0/326                                                                       |
| Goodness-of-fit on F <sup>2</sup> | 0.893                                                                            |
| Final R indices [I > 2sigma(I)]   | R1 = 0.0626, wR2 = 0.1356                                                        |
| R indices (all data)              | R1 = 0.1214, wR2 = 0.1556                                                        |
| Extinction coefficient            | n/a                                                                              |
| Largest diff. peak and hole       | 0.547 and -0.948 e.Å <sup>-3</sup>                                               |

**Table S2.** Bond lengths (Å) and angles (°) for **8**.

|             |            |              |          |
|-------------|------------|--------------|----------|
| Mo(1)-N(1)  | 1.735(5)   | C(12)-H(12B) | 0.9800   |
| Mo(1)-N(2)  | 1.754(5)   | C(12)-H(12C) | 0.9800   |
| Mo(1)-O(1)  | 2.326(4)   | C(3)-H(3)    | 0.9500   |
| Mo(1)-Cl(1) | 2.4054(16) | O(1)-C(20)   | 1.433(8) |
| Mo(1)-O(2)  | 2.408(4)   | O(1)-C(21)   | 1.458(7) |
| Mo(1)-Cl(2) | 2.4099(16) | O(2)-C(23)   | 1.449(8) |
| N(1)-C(1)   | 1.408(8)   | O(2)-C(22)   | 1.459(8) |
| C(6)-C(5)   | 1.397(9)   | C(21)-C(22)  | 1.500(9) |
| C(6)-C(1)   | 1.412(8)   | C(21)-H(21A) | 0.9900   |
| C(6)-C(10)  | 1.515(8)   | C(21)-H(21B) | 0.9900   |
| C(1)-C(2)   | 1.450(8)   | C(22)-H(22A) | 0.9900   |
| C(7)-C(2)   | 1.520(9)   | C(22)-H(22B) | 0.9900   |

**Table S2.** *Cont.*

|                  |            |                     |           |
|------------------|------------|---------------------|-----------|
| C(7)-C(9)        | 1.532(9)   | C(20)-H(20A)        | 0.9800    |
| C(7)-C(8)        | 1.536(10)  | C(20)-H(20B)        | 0.9800    |
| C(7)-H(7)        | 1.0000     | C(20)-H(20C)        | 0.9800    |
| C(2)-C(3)        | 1.378(9)   | C(23)-H(23A)        | 0.9800    |
| C(5)-C(4)        | 1.392(9)   | C(23)-H(23B)        | 0.9800    |
| C(5)-H(5)        | 0.9500     | C(23)-H(23C)        | 0.9800    |
| C(11)-C(10)      | 1.542(10)  | N(2)-C(31)          | 1.413(7)  |
| C(11)-H(11A)     | 0.9800     | C(32)-C(33)         | 1.381(8)  |
| C(11)-H(11B)     | 0.9800     | C(32)-C(31)         | 1.417(8)  |
| C(11)-H(11C)     | 0.9800     | C(32)-C(37)         | 1.513(9)  |
| C(10)-C(12)      | 1.537(9)   | C(36)-C(35)         | 1.393(8)  |
| C(10)-H(10)      | 1.0000     | C(36)-C(31)         | 1.422(8)  |
| C(4)-C(3)        | 1.384(10)  | C(36)-C(40)         | 1.504(9)  |
| C(4)-H(4)        | 0.9500     | C(35)-C(34)         | 1.391(9)  |
| C(9)-H(9A)       | 0.9800     | C(35)-H(35)         | 0.9500    |
| C(9)-H(9B)       | 0.9800     | C(37)-C(38)         | 1.517(9)  |
| C(9)-H(9C)       | 0.9800     | C(37)-C(39)         | 1.557(9)  |
| C(8)-H(8A)       | 0.9800     | C(37)-H(37)         | 1.0000    |
| C(8)-H(8B)       | 0.9800     | C(40)-C(42)         | 1.519(9)  |
| C(8)-H(8C)       | 0.9800     | C(40)-C(41)         | 1.541(10) |
| C(12)-H(12A)     | 0.9800     | C(40)-H(40)         | 1.0000    |
| C(33)-C(34)      | 1.385(10)  | N(1)-C(1)-C(2)      | 119.1(5)  |
| C(33)-H(33)      | 0.9500     | C(6)-C(1)-C(2)      | 121.7(6)  |
| C(34)-H(34)      | 0.9500     | C(2)-C(7)-C(9)      | 110.5(6)  |
| C(39)-H(39A)     | 0.9800     | C(2)-C(7)-C(8)      | 110.5(5)  |
| C(39)-H(39B)     | 0.9800     | C(9)-C(7)-C(8)      | 111.7(6)  |
| C(39)-H(39C)     | 0.9800     | C(2)-C(7)-H(7)      | 108.0     |
| C(38)-H(38A)     | 0.9800     | C(9)-C(7)-H(7)      | 108.0     |
| C(38)-H(38B)     | 0.9800     | C(8)-C(7)-H(7)      | 108.0     |
| C(38)-H(38C)     | 0.9800     | C(3)-C(2)-C(1)      | 117.3(6)  |
| C(41)-H(41A)     | 0.9800     | C(3)-C(2)-C(7)      | 121.7(6)  |
| C(41)-H(41B)     | 0.9800     | C(1)-C(2)-C(7)      | 121.0(6)  |
| C(41)-H(41C)     | 0.9800     | C(4)-C(5)-C(6)      | 121.6(6)  |
| C(42)-H(42A)     | 0.9800     | C(4)-C(5)-H(5)      | 119.2     |
| C(42)-H(42B)     | 0.9800     | C(6)-C(5)-H(5)      | 119.2     |
| C(42)-H(42C)     | 0.9800     | C(10)-C(11)-H(11A)  | 109.5     |
|                  |            | C(10)-C(11)-H(11B)  | 109.5     |
| N(1)-Mo(1)-N(2)  | 105.2(2)   | H(11A)-C(11)-H(11B) | 109.5     |
| N(1)-Mo(1)-O(1)  | 163.33(18) | C(10)-C(11)-H(11C)  | 109.5     |
| N(2)-Mo(1)-O(1)  | 91.47(19)  | H(11A)-C(11)-H(11C) | 109.5     |
| N(1)-Mo(1)-Cl(1) | 95.63(17)  | H(11B)-C(11)-H(11C) | 109.5     |
| N(2)-Mo(1)-Cl(1) | 98.94(16)  | C(6)-C(10)-C(12)    | 112.1(6)  |
| O(1)-Mo(1)-Cl(1) | 82.01(11)  | C(6)-C(10)-C(11)    | 109.7(5)  |
| N(1)-Mo(1)-O(2)  | 93.86(19)  | C(12)-C(10)-C(11)   | 111.9(6)  |
| N(2)-Mo(1)-O(2)  | 160.8(2)   | C(6)-C(10)-H(10)    | 107.6     |
| O(1)-Mo(1)-O(2)  | 69.47(15)  | C(12)-C(10)-H(10)   | 107.6     |

**Table S2.** *Cont.*

|                     |           |                     |          |
|---------------------|-----------|---------------------|----------|
| Cl(1)-Mo(1)-O(2)    | 81.09(11) | C(11)-C(10)-H(10)   | 107.6    |
| N(1)-Mo(1)-Cl(2)    | 94.11(17) | C(3)-C(4)-C(5)      | 120.4(6) |
| N(2)-Mo(1)-Cl(2)    | 96.86(16) | C(3)-C(4)-H(4)      | 119.8    |
| O(1)-Mo(1)-Cl(2)    | 83.20(11) | C(5)-C(4)-H(4)      | 119.8    |
| Cl(1)-Mo(1)-Cl(2)   | 158.57(6) | C(7)-C(9)-H(9A)     | 109.5    |
| O(2)-Mo(1)-Cl(2)    | 79.24(11) | C(7)-C(9)-H(9B)     | 109.5    |
| C(1)-N(1)-Mo(1)     | 174.3(4)  | H(9A)-C(9)-H(9B)    | 109.5    |
| C(5)-C(6)-C(1)      | 117.2(5)  | C(7)-C(9)-H(9C)     | 109.5    |
| C(5)-C(6)-C(10)     | 121.5(6)  | H(9A)-C(9)-H(9C)    | 109.5    |
| C(1)-C(6)-C(10)     | 121.2(6)  | H(9B)-C(9)-H(9C)    | 109.5    |
| N(1)-C(1)-C(6)      | 119.1(5)  | C(7)-C(8)-H(8A)     | 109.5    |
| C(7)-C(8)-H(8B)     | 109.5     | H(20A)-C(20)-H(20C) | 109.5    |
| H(8A)-C(8)-H(8B)    | 109.5     | H(20B)-C(20)-H(20C) | 109.5    |
| C(7)-C(8)-H(8C)     | 109.5     | O(2)-C(23)-H(23A)   | 109.5    |
| H(8A)-C(8)-H(8C)    | 109.5     | O(2)-C(23)-H(23B)   | 109.5    |
| H(8B)-C(8)-H(8C)    | 109.5     | H(23A)-C(23)-H(23B) | 109.5    |
| C(10)-C(12)-H(12A)  | 109.5     | O(2)-C(23)-H(23C)   | 109.5    |
| C(10)-C(12)-H(12B)  | 109.5     | H(23A)-C(23)-H(23C) | 109.5    |
| H(12A)-C(12)-H(12B) | 109.5     | H(23B)-C(23)-H(23C) | 109.5    |
| C(10)-C(12)-H(12C)  | 109.5     | C(31)-N(2)-Mo(1)    | 157.8(4) |
| H(12A)-C(12)-H(12C) | 109.5     | C(33)-C(32)-C(31)   | 117.2(6) |
| H(12B)-C(12)-H(12C) | 109.5     | C(33)-C(32)-C(37)   | 120.4(6) |
| C(2)-C(3)-C(4)      | 121.7(6)  | C(31)-C(32)-C(37)   | 122.4(5) |
| C(2)-C(3)-H(3)      | 119.1     | C(35)-C(36)-C(31)   | 116.8(6) |
| C(4)-C(3)-H(3)      | 119.1     | C(35)-C(36)-C(40)   | 121.4(6) |
| C(20)-O(1)-C(21)    | 111.4(5)  | C(31)-C(36)-C(40)   | 121.7(5) |
| C(20)-O(1)-Mo(1)    | 120.3(4)  | N(2)-C(31)-C(32)    | 118.9(5) |
| C(21)-O(1)-Mo(1)    | 113.9(3)  | N(2)-C(31)-C(36)    | 118.9(5) |
| C(23)-O(2)-C(22)    | 111.4(5)  | C(32)-C(31)-C(36)   | 122.3(5) |
| C(23)-O(2)-Mo(1)    | 119.9(4)  | C(34)-C(35)-C(36)   | 121.9(6) |
| C(22)-O(2)-Mo(1)    | 113.9(3)  | C(34)-C(35)-H(35)   | 119.1    |
| O(1)-C(21)-C(22)    | 105.4(5)  | C(36)-C(35)-H(35)   | 119.1    |
| O(1)-C(21)-H(21A)   | 110.7     | C(32)-C(37)-C(38)   | 111.9(6) |
| C(22)-C(21)-H(21A)  | 110.7     | C(32)-C(37)-C(39)   | 111.9(5) |
| O(1)-C(21)-H(21B)   | 110.7     | C(38)-C(37)-C(39)   | 110.9(6) |
| C(22)-C(21)-H(21B)  | 110.7     | C(32)-C(37)-H(37)   | 107.3    |
| H(21A)-C(21)-H(21B) | 108.8     | C(38)-C(37)-H(37)   | 107.3    |
| O(2)-C(22)-C(21)    | 107.5(5)  | C(39)-C(37)-H(37)   | 107.3    |
| O(2)-C(22)-H(22A)   | 110.2     | C(36)-C(40)-C(42)   | 114.8(6) |
| C(21)-C(22)-H(22A)  | 110.2     | C(36)-C(40)-C(41)   | 110.6(6) |
| O(2)-C(22)-H(22B)   | 110.2     | C(42)-C(40)-C(41)   | 109.4(6) |
| C(21)-C(22)-H(22B)  | 110.2     | C(36)-C(40)-H(40)   | 107.3    |
| H(22A)-C(22)-H(22B) | 108.5     | C(42)-C(40)-H(40)   | 107.3    |
| O(1)-C(20)-H(20A)   | 109.5     | C(41)-C(40)-H(40)   | 107.3    |
| O(1)-C(20)-H(20B)   | 109.5     | C(32)-C(33)-C(34)   | 122.3(6) |
| H(20A)-C(20)-H(20B) | 109.5     | C(32)-C(33)-H(33)   | 118.9    |

**Table S2.** *Cont.*

|                     |          |                     |       |
|---------------------|----------|---------------------|-------|
| O(1)-C(20)-H(20C)   | 109.5    | C(34)-C(33)-H(33)   | 118.9 |
| C(33)-C(34)-C(35)   | 119.5(6) | H(38A)-C(38)-H(38C) | 109.5 |
| C(33)-C(34)-H(34)   | 120.3    | H(38B)-C(38)-H(38C) | 109.5 |
| C(35)-C(34)-H(34)   | 120.3    | C(40)-C(41)-H(41A)  | 109.5 |
| C(37)-C(39)-H(39A)  | 109.5    | C(40)-C(41)-H(41B)  | 109.5 |
| C(37)-C(39)-H(39B)  | 109.5    | H(41A)-C(41)-H(41B) | 109.5 |
| H(39A)-C(39)-H(39B) | 109.5    | C(40)-C(41)-H(41C)  | 109.5 |
| C(37)-C(39)-H(39C)  | 109.5    | H(41A)-C(41)-H(41C) | 109.5 |
| H(39A)-C(39)-H(39C) | 109.5    | H(41B)-C(41)-H(41C) | 109.5 |
| H(39B)-C(39)-H(39C) | 109.5    | C(40)-C(42)-H(42A)  | 109.5 |
| C(37)-C(38)-H(38A)  | 109.5    | C(40)-C(42)-H(42B)  | 109.5 |
| C(37)-C(38)-H(38B)  | 109.5    | H(42A)-C(42)-H(42B) | 109.5 |
| H(38A)-C(38)-H(38B) | 109.5    | C(40)-C(42)-H(42C)  | 109.5 |
| C(37)-C(38)-H(38C)  | 109.5    | H(42A)-C(42)-H(42C) | 109.5 |
| H(42B)-C(42)-H(42C) | 109.5    |                     |       |

Symmetry transformations used to generate equivalent atoms.
